# Supplementary material
Source: publisher figshare collection journal article supplement (https://diabetesjournals.figshare.com/articles/dataset/_/24830766)
Supplement: Supplementary file 1 [file 43679565]

## Supplementary Material

### Zhu, Qian, et al. Modifiable Lifestyle Factors, Genetic Risk, and Incident Peripheral Artery Disease among Individuals with Type 2 Diabetes: A Prospective Study

#### Supplementary Method

**S1 Figure.** Flowchart of participants included in the analysis

**S2 Figure.** Distribution of the genetic risk score (GRS) for PAD using 19 SNPs

**S3 Figure.** Dose-response relationship of weighted healthy lifestyle score with risk of PAD among 14,543 participants with T2D

**S4 Figure.** Stratified analyses of the associations of the weighted healthy lifestyle score with risks of PAD among participants with T2D

**S1 Table.** Information of 19 peripheral arterial disease-associated SNPs used in this study

**S2 Table.** HRs (95% CIs) of PAD according to individual healthy lifestyle factor in 14,543 participants with T2D

**S3 Table.** HRs (95% CIs) of PAD according to genetic risk among 10,836 participants with T2D

**S4 Table.** HRs (95% CIs) of PAD according to healthy lifestyle categories within each genetic risk group among 10,836 participants with T2D

**S5 Table.** Multivariable-adjusted linear regression models for the association between the weighted healthy lifestyle score and biomarker levels among participants with T2D

**S6 Table.** Risk estimates of PAD associated with the selected biomarkers (1-SD increment) among participants with T2D

**S7 Table.** HRs (95% CIs) of PAD according to different combinations of healthy lifestyle factors among 14,543 participants with T2D

**S8 Table.** HRs (95% CIs) of PAD according to unweighted healthy lifestyle score among 14,543 participants with T2D

**S9 Table.** HRs (95% CIs) of PAD according to healthy lifestyle categories among participants with T2D after excluding the cases occurred within the first two-years of follow-up

**S10 Table.** HRs (95% CIs) of PAD according to healthy lifestyle categories using moderate drinking and non-drinking as the healthy behavior in participants with T2D

**S11 Table.** HRs (95% CIs) of PAD according to healthy lifestyle categories using optimal BMI or optimal waist circumference as the healthy behavior in participants with T2D

**S12 Table.** HRs (95% CIs) of PAD according to healthy lifestyle categories using optimal pack years of smoking instead of non-smoking status as the healthy behavior in participants with T2D

**S13 Table.** HRs (95% CIs) of PAD according to healthy lifestyle categories among participants with T2D using two competing risk models

## **Supplementary Method**

### ***Selection and Measurement of the circulating biomarkers***

In detail, potential biological biomarkers included hepatic function [albumin, alkaline phosphatase, alanine aminotransferase, aspartate aminotransferase, gamma glutamyltransferase, total bilirubin, and total protein], renal function [cystatin C, creatinine, urea, and urate], inflammation [C-reactive protein and white blood cell count], lipid profiles [high density lipoprotein cholesterol (HDL-C), low density lipoprotein cholesterol (LDL-C), total cholesterol, triglycerides, apolipoprotein A, apolipoprotein B, and lipoprotein (a) [Lp(a)]], and blood pressure [diastolic blood pressure (DBP) and systolic blood pressure (SBP)], and glycated hemoglobin (HbA<sub>1c</sub>). The measurement of abovementioned blood biomarkers in UK Biobank was externally validated using strict quality control.

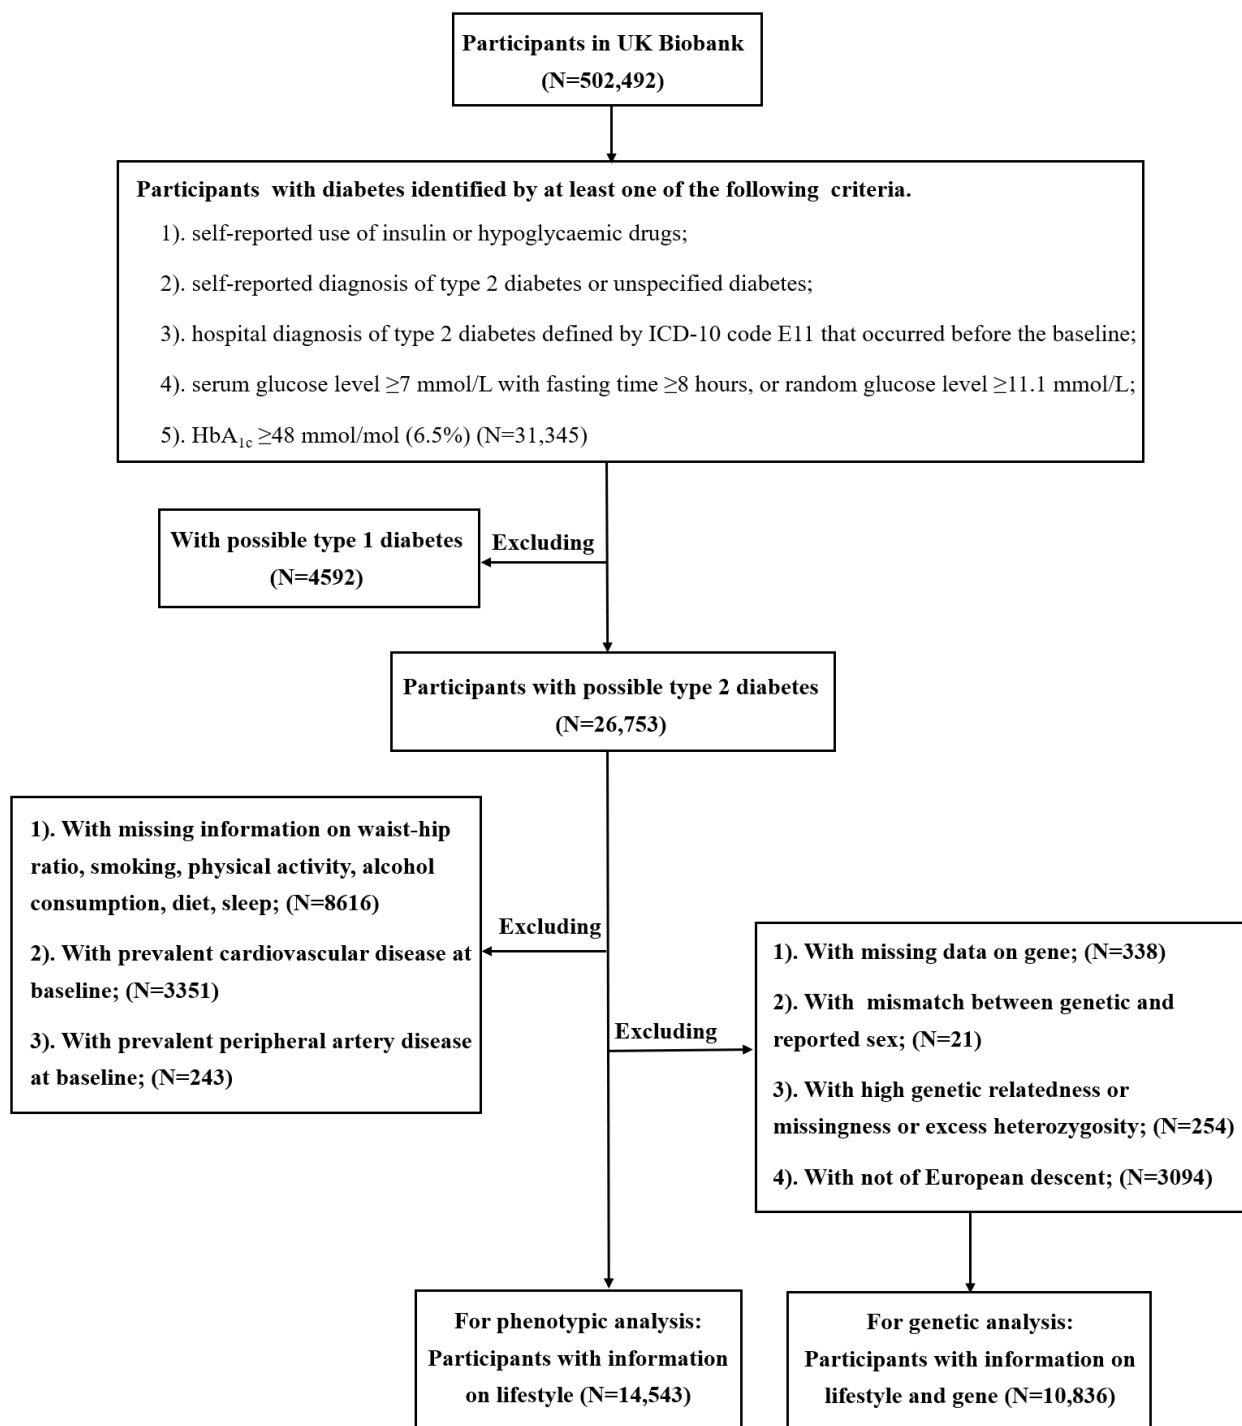

**S1 Figure.** Flowchart of participants included in the analysis

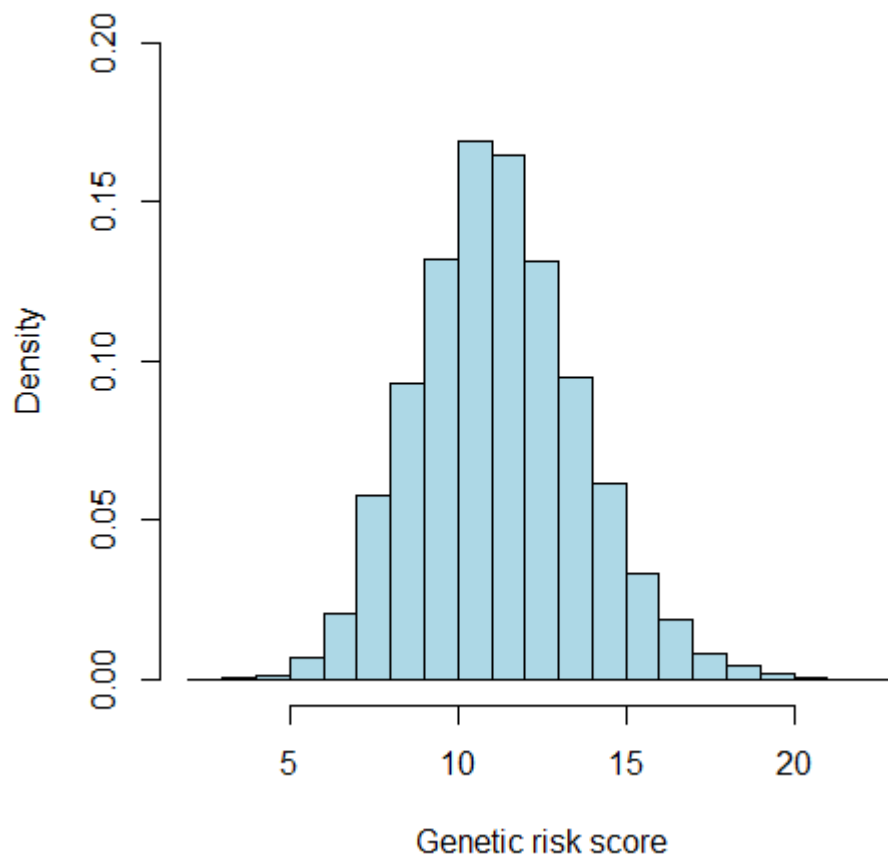

**S2 Figure.** Distribution of the genetic risk score (GRS) for PAD using 19 SNPs

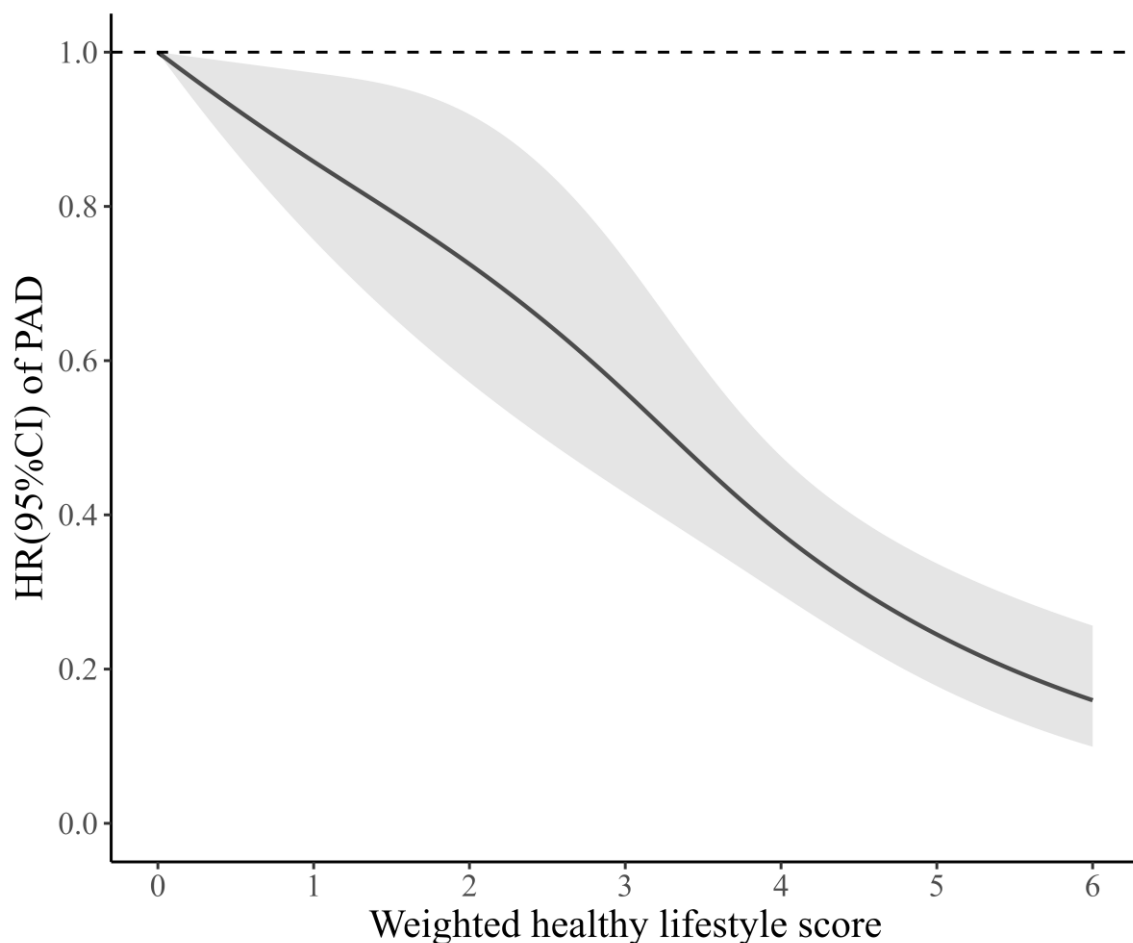

**S3 Figure.** Dose-response relationship of weighted healthy lifestyle score with risk of PAD among 14,543 participants with T2D

Models were adjusted for age (continuous, years), sex (male, female), ethnicity (White, others), education attainment (college or university degree, A/AS levels or equivalent or O levels/GCSEs or equivalent or other professional qualifications, or none of the above), Townsend Deprivation Index (continuous), family history of CVD (yes, no), prevalence of hypertension (yes, no), use of antihypertensive medication (yes, no), use of lipid-lowering medication (yes, no), use of aspirin (yes, no), diabetes duration (continuous, years), HbA<sub>1c</sub> (continuous, %), and use of diabetes medication (none, only oral medication pills, or only insulin or combination of oral medications and insulin).  $P_{\text{nonlinearity}}=0.07$  and  $P$  for overall association were  $<0.0001$ .

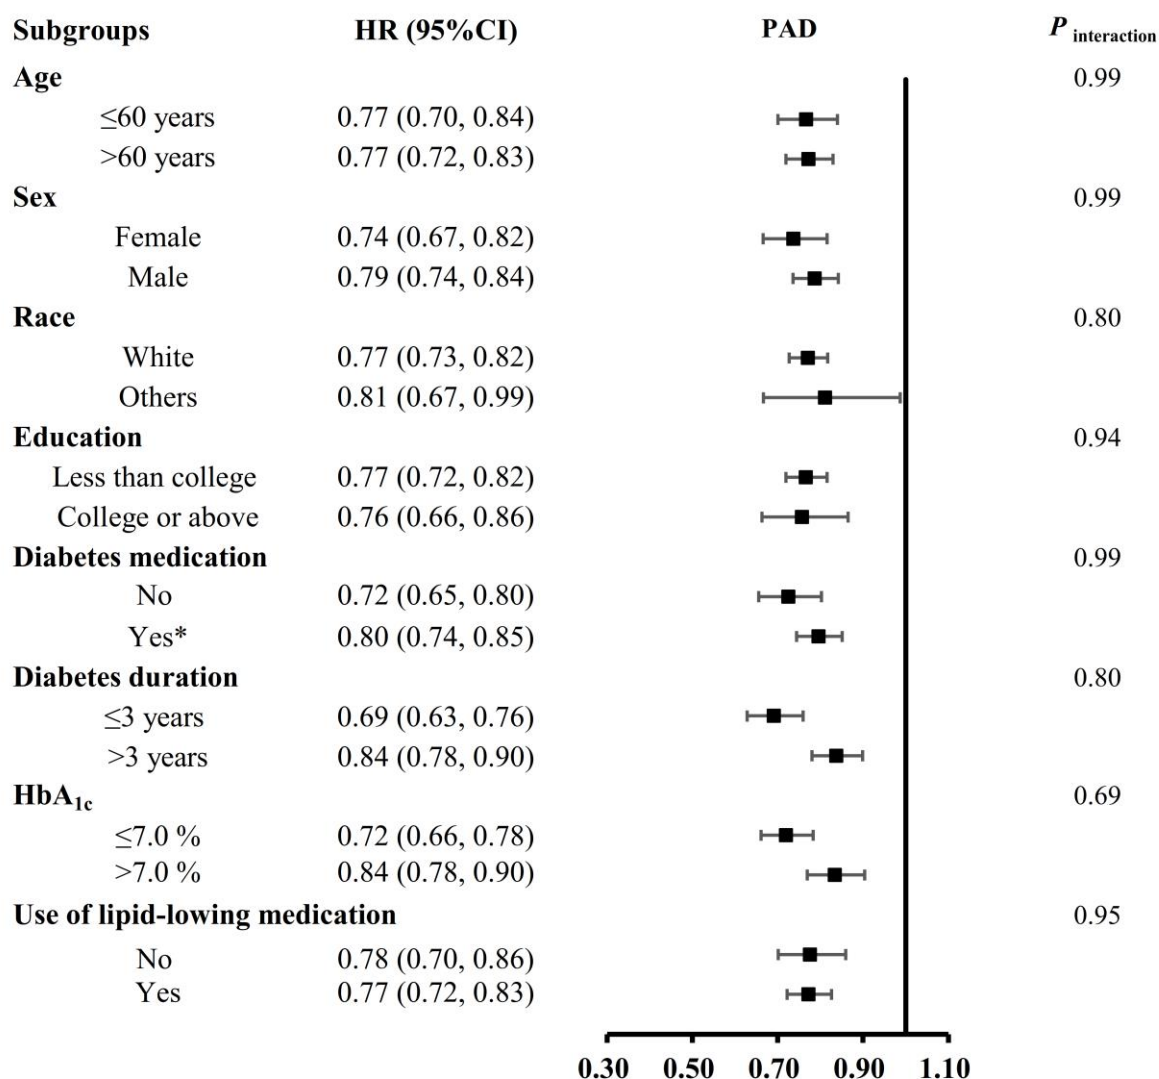

**S4 Figure.** Stratified analyses of the associations of the weighted healthy lifestyle score<sup>†</sup> with risks of PAD among participants with T2D

Models were adjusted for age (continuous, years), sex (male, female), ethnicity (White, others), education attainment (college or university degree, A/AS levels or equivalent or O levels/GCSEs or equivalent or other professional qualifications, or none of the above), Townsend Deprivation Index (continuous), family history of CVD (yes, no), prevalence of hypertension (yes, no), use of antihypertensive medication (yes, no), use of lipid-lowering medication (yes, no), use of aspirin (yes, no), diabetes duration (continuous, years), HbA<sub>1c</sub> (continuous, %), and use of diabetes medication (none, only oral medication pills, or only insulin or combination of oral medications and insulin) except for the stratifying factors.

\*The group of diabetes medications (yes) included participants taking insulin and/or oral medications. <sup>†</sup>Per one-point increment of the weighted healthy lifestyle score

**S1 Table.** Information of 19 peripheral arterial disease-associated SNPs used in this study

| <b>rsID</b> | <b>Chr</b> | <b>Risk/reference allele</b> | <b>OR (95% CI)</b> | <b>P-value</b>         |
|-------------|------------|------------------------------|--------------------|------------------------|
| rs7528419   | 1          | A/G                          | 1.07 (1.05, 1.09)  | $2.54 \times 10^{-11}$ |
| rs6025      | 1          | T/C                          | 1.20 (1.14, 1.26)  | $1.63 \times 10^{-12}$ |
| rs118039278 | 6          | A/G                          | 1.26 (1.22, 1.30)  | $1.57 \times 10^{-43}$ |
| rs3130968   | 6          | T/C                          | 1.07 (1.05, 1.10)  | $3.16 \times 10^{-10}$ |
| rs2107595   | 7          | A/G                          | 1.08 (1.05, 1.10)  | $2.49 \times 10^{-11}$ |
| rs4722172   | 7          | G/A                          | 1.08 (1.05, 1.10)  | $3.65 \times 10^{-11}$ |
| rs322       | 8          | A/C                          | 1.06 (1.04, 1.07)  | $2.53 \times 10^{-9}$  |
| rs505922    | 9          | C/T                          | 1.06 (1.04, 1.07)  | $7.10 \times 10^{-11}$ |
| rs1537372   | 9          | T/G                          | 1.12 (1.10, 1.14)  | $4.32 \times 10^{-39}$ |
| rs7903146   | 10         | T/C                          | 1.06 (1.04, 1.08)  | $3.76 \times 10^{-11}$ |
| rs566125    | 11         | T/C                          | 1.08 (1.05, 1.11)  | $4.37 \times 10^{-9}$  |
| rs7476      | 11         | C/A                          | 1.06 (1.04, 1.08)  | $8.33 \times 10^{-10}$ |
| rs11066301  | 12         | G/A                          | 1.06 (1.04, 1.08)  | $2.96 \times 10^{-11}$ |
| rs4842266   | 12         | G/A                          | 1.06 (1.04, 1.08)  | $1.01 \times 10^{-9}$  |
| rs1975514   | 13         | C/T                          | 1.05 (1.04, 1.07)  | $8.32 \times 10^{-10}$ |
| rs55784307  | 14         | A/C                          | 1.06 (1.04, 1.09)  | $2.93 \times 10^{-8}$  |
| rs10851907  | 15         | A/G                          | 1.06 (1.05, 1.08)  | $1.49 \times 10^{-13}$ |
| rs62084752  | 17         | C/G                          | 1.07 (1.05, 1.09)  | $1.58 \times 10^{-10}$ |
| rs138294113 | 19         | C/T                          | 1.09 (1.06, 1.11)  | $1.20 \times 10^{-10}$ |

**S2 Table.** HRs (95% CIs) of PAD according to individual healthy lifestyle factor in 14,543 participants with T2D

|                                        | PAD          |       |                   |
|----------------------------------------|--------------|-------|-------------------|
|                                        | Person-years | Cases | HR (95% CI) *     |
| <b>Smoking</b>                         |              |       |                   |
| Ever smoking (>0 smoking pack-year)    | 91,475       | 450   | 1.00              |
| Non-smoking (0 smoking pack-year)      | 94,915       | 178   | 0.49 (0.41, 0.59) |
| <b>Physical activity*</b>              |              |       |                   |
| Irregular                              | 100,392      | 362   | 1.00              |
| Regular                                | 85,998       | 266   | 0.90 (0.76, 1.05) |
| <b>Dietary score</b>                   |              |       |                   |
| < 5 ideal components                   | 149,566      | 518   | 1.00              |
| ≥5 ideal components                    | 36,824       | 110   | 0.92 (0.75, 1.13) |
| <b>Alcohol intake</b>                  |              |       |                   |
| Others                                 | 66,440       | 249   | 1.00              |
| 1-28 g/day (men) or 1-14 g/day (women) | 119,950      | 379   | 0.81 (0.69, 0.95) |
| <b>Waist-hip ratio</b>                 |              |       |                   |
| ≥0.90 (men) or ≥0.85 (women)           | 152,520      | 576   | 1.00              |
| < 0.90 (men) or < 0.85 (women)         | 33,869       | 52    | 0.68 (0.50, 0.91) |
| <b>Sleep duration</b>                  |              |       |                   |
| <7 or >8hours/day                      | 72,583       | 260   | 1.00              |
| 7-8 hours/day                          | 113,806      | 368   | 0.97 (0.83, 1.14) |

Model was adjusted for age (continuous, years), sex (male, female), ethnicity (White, others), education attainment (college or university degree, A/AS levels or equivalent or O levels/GCSEs or equivalent or other professional qualifications, or none of the above), Townsend Deprivation Index (continuous), family history of CVD (yes, no), prevalence of hypertension (yes, no), use of antihypertensive medication (yes, no), use of lipid-lowering medication (yes, no), use of aspirin (yes, no), diabetes duration (continuous, years), HbA<sub>1c</sub> (continuous, %), and use of diabetes medication (none, only oral medication pills, or only insulin or combination of oral medications and insulin). Individual lifestyle factors were mutually adjusted in model.

\* Regular physical activity was defined as ≥150 min/week of moderate activity, ≥75 min/week of vigorous activity, or an equivalent combination.



**S3 Table.** HRs (95% CIs) of PAD according to genetic risk among 10,836 participants\* with T2D

|                          | Genetic risk         |                               |                        |       | <i>P</i> <sub>trend</sub> | Per SD increment<br>in genetic risk |
|--------------------------|----------------------|-------------------------------|------------------------|-------|---------------------------|-------------------------------------|
|                          | Low (lowest tertile) | Intermediate (middle tertile) | High (highest tertile) |       |                           |                                     |
| No of Cases/person-years | 168/62,286           | 211/62,289                    | 234/62,009             | -     | -                         | -                                   |
| Model 1                  | 1                    | 1.22 (0.98, 1.53)             | 1.38 (1.11, 1.72)      | 0.004 |                           | 1.13 (1.03, 1.23)                   |
| Model 2                  | 1                    | 1.22 (0.98, 1.53)             | 1.37 (1.10, 1.71)      | 0.005 |                           | 1.13 (1.03, 1.23)                   |

**Model 1:** age (continuous, years), sex (male, female), Townsend Deprivation Index (continuous), race/ethnicity (White, others), education attainment (college or university degree, A/AS levels or equivalent or O levels/GCSEs or equivalent or other professional qualifications, or none of the above), family history of CVD (yes, no), prevalence of hypertension (yes, no), use of antihypertensive medication (yes, no), use of lipid-lowering medication (yes, no), use of aspirin (yes, no), diabetes duration (continuous, years), HbA<sub>1c</sub> (continuous, %), use of diabetes medication (none, only oral medication pills, or only insulin or combination of oral medications and insulin), genotype measurement batch, and the first 10 principal components of ancestry.

**Model 2:** Model 1 + weighted healthy lifestyle scores (continuous).

\*The genetic analyses were conducted among 10,836 participants with T2D who had the genetic information available.

**S4 Table.** HRs (95% CIs) of PAD according to healthy lifestyle categories within each genetic risk group among 10,836 participants\* with T2D

| Healthy lifestyle categories | Low Genetic risk |                   |                   | Intermediate Genetic risk |                   |                   | High Genetic risk |                   |                   |
|------------------------------|------------------|-------------------|-------------------|---------------------------|-------------------|-------------------|-------------------|-------------------|-------------------|
|                              | Unfavorable      | Intermediate      | Favorable         | Unfavorable               | Intermediate      | Favorable         | Unfavorable       | Intermediate      | Favorable         |
| Cases/N                      | 31/596           | 98/2185           | 13/831            | 47/572                    | 110/2228          | 14/813            | 55/595            | 117/2206          | 14/810            |
| HR (95% CI)                  | 1                | 0.92 (0.61, 1.39) | 0.38 (0.20, 0.73) | 1                         | 0.58 (0.41, 0.81) | 0.25 (0.13, 0.45) | 1                 | 0.64 (0.46, 0.89) | 0.26 (0.14, 0.47) |
| <i>P</i> value for trend     |                  | 0.002             |                   |                           | <0.0001           |                   |                   | <0.0001           |                   |
| <i>P</i> interaction         |                  |                   |                   |                           | 0.97              |                   |                   |                   |                   |

Model was adjusted for age (continuous, years), sex (male, female), education attainment (college or university degree, A/AS levels or equivalent or O levels/GCSEs or equivalent or other professional qualifications, or none of the above), Townsend Deprivation Index (continuous), family history of CVD (yes, no), prevalence of hypertension (yes, no), use of antihypertensive medication (yes, no), use of lipid-lowering medication (yes, no), use of aspirin (yes, no), diabetes duration (continuous, years), HbA<sub>1c</sub> (continuous, %), use of diabetes medication (none, only oral medication pills, or only insulin or combination of oral medications and insulin), genotype measurement batch, and the first 10 principal components of ancestry.

\*The genetic analyses were conducted among 10,836 participants with T2D who had the genetic information available

**S5 Table.** Multivariable-adjusted linear regression models for the association between the weighted healthy lifestyle score and biomarker levels among participants with T2D\*

| <b>Risk factors</b>                        | <b><math>\beta</math></b> | <b>Lower<br/>95%CI</b> | <b>Upper<br/>95%CI</b> | <b>P- value</b> |
|--------------------------------------------|---------------------------|------------------------|------------------------|-----------------|
| <b>Biomarkers of renal function</b>        |                           |                        |                        |                 |
| Cystatin C (mg/L)                          | -0.0927                   | -0.1208                | -0.0645                | <0.0001         |
| Creatinine ( $\mu$ mol/L)                  | 0.0982                    | 0.0676                 | 0.1287                 | <0.0001         |
| Urate ( $\mu$ mol/L)                       | -0.0938                   | -0.1217                | -0.0659                | <0.0001         |
| Urea (mmol/L)                              | 0.1074                    | 0.0796                 | 0.1352                 | <0.0001         |
| <b>Biomarkers of liver function</b>        |                           |                        |                        |                 |
| Alanine aminotransferase (U/L)             | -0.1112                   | -0.1391                | -0.0832                | <0.0001         |
| Alkaline phosphatase (U/L)                 | -0.0922                   | -0.1194                | -0.0650                | <0.0001         |
| Aspartate aminotransferase (U/L)           | -0.0541                   | -0.0810                | -0.0273                | <0.0001         |
| Gamma glutamyltransferase (U/L)            | -0.2392                   | -0.2668                | -0.2116                | <0.0001         |
| Total bilirubin ( $\mu$ mol/L)             | 0.1333                    | 0.1056                 | 0.1609                 | <0.0001         |
| Total protein (g/L)                        | 0.0395                    | 0.0113                 | 0.0676                 | 0.01            |
| Albumin (g/L)                              | 0.0609                    | 0.0328                 | 0.0890                 | <0.0001         |
| <b>Biomarkers of lipid profile</b>         |                           |                        |                        |                 |
| Total blood cholesterol (mmol/L)           | -0.0740                   | -0.1057                | -0.0423                | <0.0001         |
| HDL-C (mmol/L)                             | 0.1345                    | 0.1048                 | 0.1641                 | <0.0001         |
| LDL-C (mmol/L)                             | -0.0831                   | -0.1149                | -0.0512                | <0.0001         |
| Triglycerides (mmol/L)                     | -0.2127                   | -0.2399                | -0.1855                | <0.0001         |
| Apolipoprotein A (g/L)                     | 0.0920                    | 0.0625                 | 0.1214                 | <0.0001         |
| Apolipoprotein B (g/L)                     | -0.1304                   | -0.1612                | -0.0996                | <0.0001         |
| Lipoprotein (a) (nmol/L)                   | 0.0184                    | -0.0118                | 0.0485                 | 0.23            |
| <b>Inflammatory biomarkers</b>             |                           |                        |                        |                 |
| C-reactive protein (mg/L)                  | -0.2474                   | -0.2752                | -0.2196                | <0.0001         |
| White blood cell count ( $\times 10^9/L$ ) | -0.2134                   | -0.2396                | -0.1873                | <0.0001         |
| <b>Blood pressure indices</b>              |                           |                        |                        |                 |
| SBP (mmHg)                                 | 0.0034                    | -0.0172                | 0.0240                 | 0.75            |
| DBP (mmHg)                                 | -0.0384                   | -0.0589                | -0.0179                | 0.0002          |
| <b>Biomarkers of glucose metabolism</b>    |                           |                        |                        |                 |
| HbA <sub>1c</sub> (%)                      | -0.0777                   | -0.0976                | -0.0579                | <0.0001         |

Model was adjusted for age (continuous, years), sex (male, female), ethnicity (White, others), education attainment (college or university degree, A/AS levels or equivalent or O levels/GCSEs or equivalent or other professional qualifications, or none of the above), Townsend Deprivation Index (continuous), family history of CVD (yes, no), prevalence of hypertension (yes, no), use of antihypertensive medication, use of lipid-lowering medication, use of aspirin (yes, no), diabetes duration (continuous, years), HbA<sub>1c</sub> (continuous, %), and use of diabetes medication (none, only oral medication pills, or only insulin or combination of oral medications and insulin).

For biomarkers of systolic blood pressure and diastolic blood pressure, model was not adjusted for prevalence of hypertension (yes, no). HbA<sub>1c</sub> (continuous, %) levels were not adjusted when HbA<sub>1c</sub> was analyzed as a biomarker in model.

\* The levels of biomarkers were nature log transformed except for systolic blood pressure and diastolic blood pressure

**S6 Table.** Risk estimates of PAD associated with the selected biomarkers (1-SD increment) among participants with T2D\*

| <b>Biomarkers</b>                            | <b>HR</b> | <b>Lower</b> | <b>Upper</b> | <b>P</b> |
|----------------------------------------------|-----------|--------------|--------------|----------|
| <b>Biomarkers of renal function</b>          |           |              |              |          |
| Cystatin C (mg/L)                            | 1.43      | 1.34         | 1.52         | <0.0001  |
| Creatinine (µmol/L)                          | 1.25      | 1.15         | 1.35         | <0.0001  |
| Urate (µmol/L)                               | 1.09      | 1.00         | 1.19         | 0.04     |
| Urea (mmol/L)                                | 1.17      | 1.08         | 1.28         | 0.0001   |
| <b>Biomarkers of liver function</b>          |           |              |              |          |
| Alanine aminotransferase (U/L)               | 0.81      | 0.74         | 0.89         | <0.0001  |
| Alkaline phosphatase (U/L)                   | 1.18      | 1.09         | 1.28         | <0.0001  |
| Aspartate aminotransferase (U/L)             | 0.89      | 0.81         | 0.97         | 0.01     |
| Gamma glutamyltransferase (U/L)              | 1.06      | 0.98         | 1.16         | 0.16     |
| Total bilirubin (µmol/L)                     | 0.86      | 0.79         | 0.95         | 0.001    |
| Total protein (g/L)                          | 0.95      | 0.87         | 1.04         | 0.28     |
| Albumin (g/L)                                | 0.82      | 0.76         | 0.88         | <0.0001  |
| <b>Biomarkers of lipid profile</b>           |           |              |              |          |
| Total blood cholesterol (mmol/L)             | 1.10      | 0.99         | 1.21         | 0.07     |
| HDL-C (mmol/L)                               | 0.84      | 0.76         | 0.92         | 0.0002   |
| LDL-C (mmol/L)                               | 1.14      | 1.03         | 1.26         | 0.01     |
| Triglycerides (mmol/L)                       | 1.15      | 1.06         | 1.25         | 0.001    |
| Apolipoprotein A (g/L)                       | 0.84      | 0.77         | 0.92         | 0.0002   |
| Apolipoprotein B (g/L)                       | 1.16      | 1.05         | 1.27         | 0.003    |
| <b>Inflammatory biomarkers</b>               |           |              |              |          |
| C-reactive protein (mg/L)                    | 1.31      | 1.20         | 1.43         | <0.0001  |
| White blood cell count (x10 <sup>9</sup> /L) | 1.27      | 1.17         | 1.38         | <0.0001  |
| <b>Blood pressure indices</b>                |           |              |              |          |
| DBP (mmHg)                                   | 0.90      | 0.83         | 0.98         | 0.02     |
| <b>Biomarkers of glucose metabolism</b>      |           |              |              |          |
| HbA <sub>1c</sub> (%)                        | 1.23      | 1.13         | 1.33         | <0.0001  |

Model were adjusted for age (continuous, years), sex (male, female), ethnicity (White, others), education attainment (college or university degree, A/AS levels or equivalent or O levels/GCSEs or equivalent or other professional qualifications, or none of the above), Townsend Deprivation Index (continuous), family history of CVD (yes, no), prevalence of hypertension (yes, no), use of antihypertensive medication, use of lipid-lowering medication, use of aspirin (yes, no), diabetes duration (continuous, years), HbA<sub>1c</sub> (continuous, %), use of diabetes medication (none, only oral medication pills, or only insulin or combination of oral medications and insulin), and weighted healthy lifestyle scores (continuous).

For biomarker of diastolic blood pressure, model was not adjusted for prevalence of hypertension (yes, no). HbA<sub>1c</sub> (continuous, %) levels were not adjusted when HbA<sub>1c</sub> was analyzed as a biomarker in model.

\*The levels of biomarkers were nature log-transformed before analyses except for diastolic blood pressure.

**S7 Table.** HRs (95% CIs) of PAD according to different combinations of healthy lifestyle factors among 14,543 participants with T2D

|                                                                     | PAD          |       |                   |
|---------------------------------------------------------------------|--------------|-------|-------------------|
|                                                                     | Person-years | Cases | HR (95% CI)*      |
| <b>Two healthy factors (physical activity, alcohol consumption)</b> |              |       |                   |
| 0                                                                   | 36,254       | 147   | 1.00              |
| 1-2                                                                 | 150,136      | 481   | 0.77 (0.64, 0.93) |
| <i>P</i> -trend                                                     |              |       | 0.01              |
| <b>Three healthy factors (above two plus sleep duration)</b>        |              |       |                   |
| 0                                                                   | 15,591       | 67    | 1.00              |
| 1                                                                   | 57,286       | 210   | 0.89 (0.68, 1.18) |
| 2-3                                                                 | 113,512      | 351   | 0.75 (0.57, 0.97) |
| <i>P</i> -trend                                                     |              |       | 0.01              |
| <b>Four healthy factors (above three plus waist-hip ratio)</b>      |              |       |                   |
| 0                                                                   | 13,424       | 64    | 1.00              |
| 1                                                                   | 49,948       | 199   | 0.87 (0.66, 1.16) |
| 2                                                                   | 73,578       | 244   | 0.72 (0.55, 0.95) |
| 3-4                                                                 | 49,440       | 121   | 0.64 (0.47, 0.87) |
| <i>P</i> -trend                                                     |              |       | 0.001             |
| <b>Five healthy factors (above four plus diet)</b>                  |              |       |                   |
| 0                                                                   | 11,402       | 52    | 1.00              |
| 1                                                                   | 43,265       | 185   | 0.98 (0.72, 1.34) |
| 2                                                                   | 67,406       | 222   | 0.74 (0.55, 1.01) |
| 3                                                                   | 47,044       | 132   | 0.73 (0.53, 1.00) |
| 4 -5                                                                | 17,272       | 37    | 0.62 (0.41, 0.95) |
| <i>P</i> -trend                                                     |              |       | 0.001             |
| <b>Six healthy factors (above five plus smoking)</b>                |              |       |                   |
| 0-1                                                                 | 33,873       | 182   | 1.00              |
| 2                                                                   | 55,199       | 220   | 0.78 (0.64, 0.94) |
| 3                                                                   | 54,500       | 150   | 0.60 (0.48, 0.74) |
| 4                                                                   | 31,819       | 66    | 0.49 (0.37, 0.65) |
| 5-6                                                                 | 10,999       | 10    | 0.24 (0.12, 0.45) |
| <i>P</i> -trend                                                     |              |       | <0.0001           |

Model was adjusted for age (continuous, years), sex (male, female), ethnicity (White, others), education attainment (college or university degree, A/AS levels or equivalent or O levels/GCSEs or equivalent or other professional qualifications, or none of the above), Townsend Deprivation Index (continuous), family history of CVD (yes, no), prevalence of hypertension (yes, no), use of antihypertensive medication (yes, no), use of lipid-lowering medication (yes, no), use of aspirin (yes, no), diabetes duration (continuous, years), HbA<sub>1c</sub> (continuous, %), and use of diabetes medication (none, only oral medication pills, or only insulin or combination of oral medications and insulin), with the individual healthy factor mutual adjustment.

**S8 Table.** HRs (95% CIs) of PAD according to unweighted healthy lifestyle score among 14,543 participants with T2D

|               | Unweighted healthy lifestyle score |                   |                   |                   |                   | <i>P</i> -trend | Per 1-unit increment in unweighted lifestyle score |
|---------------|------------------------------------|-------------------|-------------------|-------------------|-------------------|-----------------|----------------------------------------------------|
|               | 0-1                                | 2                 | 3                 | 4                 | 5-6               |                 |                                                    |
| HRs (95% CIs) | 1                                  | 0.78 (0.64, 0.94) | 0.60 (0.48, 0.74) | 0.49 (0.37, 0.65) | 0.24 (0.12, 0.45) | <0.0001         | 0.79 (0.73, 0.84)                                  |

Model was adjusted for age (years), sex (male, female), ethnicity (White, others), education attainment (college or university degree, A/AS levels or equivalent or O levels/GCSEs or equivalent or other professional qualifications, or none of the above), Townsend Deprivation Index (continuous), family history of CVD (yes, no), prevalence of hypertension (yes, no), use of antihypertensive medication (yes, no), use of lipid-lowering medication (yes, no), use of aspirin (yes, no), diabetes duration (continuous, years), HbA<sub>1c</sub> (continuous, %), and use of diabetes medication (none, only oral medication pills, or only insulin or combination of oral medications and insulin).



**S9 Table.** HRs (95% CIs) of PAD according to healthy lifestyle categories among participants with T2D after excluding the cases occurred within the first two-years of follow-up

|                    | Healthy lifestyle categories* |                        |                     | <i>P</i> -trend | Per 1- point in weighted lifestyle score |
|--------------------|-------------------------------|------------------------|---------------------|-----------------|------------------------------------------|
|                    | Unfavorable lifestyle         | Intermediate lifestyle | Favorable lifestyle |                 |                                          |
| Cases/person-years | 188/37,315                    | 346/107,813            | 47/41,210           |                 |                                          |
| HRs (95% CIs)      | 1                             | 0.72 (0.60, 0.86)      | 0.31 (0.22, 0.43)   | <0.0001         | 0.78 (0.74, 0.83)                        |

Model was adjusted for age (years), sex (male, female), ethnicity (White, others), education attainment (college or university degree, A/AS levels or equivalent or O levels/GCSEs or equivalent or other professional qualifications, or none of the above), Townsend Deprivation Index (continuous), family history of CVD (yes, no), prevalence of hypertension (yes, no), use of antihypertensive medication (yes, no), use of lipid-lowering medication (yes, no), use of aspirin (yes, no), diabetes duration (continuous, years), HbA<sub>1c</sub> (continuous, %), and use of diabetes medication (none, only oral medication pills, or only insulin or combination of oral medications and insulin).

\*The weighted healthy lifestyle score was categorized as unfavorable, intermediate, and favorable lifestyle based on the distribution of the unweighted lifestyle score.

**S10 Table.** HRs (95% CIs) of PAD according to healthy lifestyle categories using moderate drinking and non-drinking as the healthy behavior in participants with T2D

|                                                                                     | Healthy lifestyle categories* |                        |                     | <i>P</i> .trend | Per 1-point increment<br>in weighted lifestyle score |
|-------------------------------------------------------------------------------------|-------------------------------|------------------------|---------------------|-----------------|------------------------------------------------------|
|                                                                                     | Unfavorable lifestyle         | Intermediate lifestyle | Favorable lifestyle |                 |                                                      |
| <b>Using moderate drinking and non-drinking<sup>†</sup> as the healthy behavior</b> |                               |                        |                     |                 |                                                      |
| Cases/person-years                                                                  | 152/27,652                    | 418/111,326            | 58/47,411           |                 |                                                      |
| HRs (95% CIs)                                                                       | 1                             | 0.78 (0.65, 0.94)      | 0.32 (0.23, 0.43)   | <0.0001         | 0.78 (0.74, 0.82)                                    |

Model was adjusted for age (continuous, years), sex (male, female), ethnicity (White, others), education attainment (college or university degree, A/AS levels or equivalent or O levels/GCSEs or equivalent or other professional qualifications, or none of the above), Townsend Deprivation Index (continuous), family history of CVD (yes, no), prevalence of hypertension (yes, no), use of antihypertensive medication (yes, no), use of lipid-lowering medication (yes, no), use of aspirin (yes, no) diabetes duration (continuous, years), HbA<sub>1c</sub> (continuous, %), and use of diabetes medication (none, only oral medication pills, or only insulin or combination of oral medications and insulin).

\*The weighted healthy lifestyle score was categorized as unfavorable, intermediate, and favorable lifestyle based on the distribution of the unweighted lifestyle score.

<sup>†</sup>Healthy alcohol drinking was defined as <28 g/d for men and <14 g/d of ethanol intakes for women.

**S11 Table.** HRs (95% CIs) of PAD according to healthy lifestyle categories using optimal BMI or optimal waist circumference as the healthy behavior in participants with T2D

|                                                                                                         | Healthy lifestyle categories* |                        |                     | <i>P</i> -trend | Per 1-point increment<br>in weighted lifestyle score |
|---------------------------------------------------------------------------------------------------------|-------------------------------|------------------------|---------------------|-----------------|------------------------------------------------------|
|                                                                                                         | Unfavorable lifestyle         | Intermediate lifestyle | Favorable lifestyle |                 |                                                      |
| <b>Using optimal BMI<sup>†</sup> instead of waist-hip ratio as the healthy behavior</b>                 |                               |                        |                     |                 |                                                      |
| Cases/person-years                                                                                      | 230/42,130                    | 315/96,247             | 82/47,447           |                 |                                                      |
| HRs (95% CIs)                                                                                           | 1                             | 0.68 (0.57, 0.80)      | 0.39 (0.30, 0.50)   | <0.0001         | 0.83 (0.80, 0.87)                                    |
| <b>Using optimal waist circumference<sup>‡</sup> instead of waist-hip ratio as the healthy behavior</b> |                               |                        |                     |                 |                                                      |
| Cases/person-years                                                                                      | 193/33,052                    | 351/105,360            | 84/48,044           |                 |                                                      |
| HRs (95% CIs)                                                                                           | 1                             | 0.63 (0.53, 0.75)      | 0.37 (0.29, 0.48)   | <0.0001         | 0.83 (0.79, 0.86)                                    |

Model was adjusted for age (continuous, years), sex (male, female), ethnicity (White, others), education attainment (college or university degree, A/AS levels or equivalent or O levels/GCSEs or equivalent or other professional qualifications, or none of the above), Townsend Deprivation Index (continuous), family history of CVD (yes, no), prevalence of hypertension (yes, no), use of antihypertensive medication (yes, no), use of lipid-lowering medication (yes, no), use of aspirin (yes, no), diabetes duration (continuous, years), HbA<sub>1c</sub> (continuous, %), and use of diabetes medication (none, only oral medication pills, or only insulin or combination of oral medications and insulin).

\*The weighted healthy lifestyle score was categorized as unfavorable, intermediate, and favorable lifestyle based on the distribution of the unweighted lifestyle score.

<sup>†</sup>Optimal BMI was defined as 18.5-24.9 kg/m<sup>2</sup> in 14,496 participants with T2D who have BMI data.

<sup>‡</sup>Optimal waist circumference was defined as <94 cm for men or <80 cm for women in 14,548 participants with T2D who have waist circumference data.

**S12 Table.** HRs (95% CIs) of PAD according to healthy lifestyle categories using optimal pack years of smoking instead of non-smoking status as the healthy behavior in 19,356 participants with T2D

|                                                                                                      | Healthy lifestyle categories* |                        |                     | <i>P</i> -trend | Per 1-point increment<br>in weighted lifestyle score |
|------------------------------------------------------------------------------------------------------|-------------------------------|------------------------|---------------------|-----------------|------------------------------------------------------|
|                                                                                                      | Unfavorable lifestyle         | Intermediate lifestyle | Favorable lifestyle |                 |                                                      |
| <b>Using non-smoking status<sup>†</sup> instead of pack years of smoking as the healthy behavior</b> |                               |                        |                     |                 |                                                      |
| Cases/person-years                                                                                   | 195/34,626                    | 500/166,848            | 72/47,326           |                 |                                                      |
| HRs (95% CIs)                                                                                        | 1                             | 0.58 (0.49, 0.69)      | 0.33 (0.25, 0.44)   | <0.0001         | 0.82 (0.79, 0.86)                                    |

Model was adjusted for age (continuous, years), sex (male, female), ethnicity (White, others), education attainment (college or university degree, A/AS levels or equivalent or O levels/GCSEs or equivalent or other professional qualifications, or none of the above), Townsend Deprivation Index (continuous), family history of CVD (yes, no), prevalence of hypertension (yes, no), use of antihypertensive medication (yes, no), use of lipid-lowering medication (yes, no), use of aspirin (yes, no), diabetes duration (continuous, years), HbA<sub>1c</sub> (continuous, %), and use of diabetes medication (none, only oral medication pills, or only insulin or combination of oral medications and insulin).

\*The weighted healthy lifestyle score was categorized as unfavorable, intermediate, and favorable lifestyle based on the distribution of the unweighted lifestyle score.

<sup>†</sup>Non-smoking status was defined as never smoking.

**S13 Table.** HRs (95% CIs) of PAD according to healthy lifestyle categories among participants with T2D using two competing risk models

|                                                | Healthy lifestyle categories* |                        |                     | <i>P</i> -trend | Per 1-point increment<br>in weighted lifestyle score |
|------------------------------------------------|-------------------------------|------------------------|---------------------|-----------------|------------------------------------------------------|
|                                                | Unfavorable lifestyle         | Intermediate lifestyle | Favorable lifestyle |                 |                                                      |
| <b>Fine-Gray subdistribution hazards model</b> |                               |                        |                     |                 |                                                      |
| HRs (95% CIs)                                  | 1                             | 0.68 (0.57, 0.82)      | 0.28 (0.20, 0.40)   | <0.0001         | 0.78 (0.74, 0.83)                                    |
| <b>Cause-specific hazards model</b>            |                               |                        |                     |                 |                                                      |
| HRs (95% CIs)                                  | 1                             | 0.66 (0.55, 0.79)      | 0.27 (0.19, 0.37)   | <0.0001         | 0.77 (0.73, 0.82)                                    |

Model was adjusted for age (continuous, years), sex (male, female), ethnicity (White, others), education attainment (college or university degree, A/AS levels or equivalent or O levels/GCSEs or equivalent or other professional qualifications, or none of the above), Townsend Deprivation Index (continuous), family history of CVD (yes, no), prevalence of hypertension (yes, no), use of antihypertensive medication (yes, no), use of lipid-lowering medication (yes, no), use of aspirin (yes, no), diabetes duration (continuous, years), HbA<sub>1c</sub> (continuous, %), and use of diabetes medication (none, only oral medication pills, or only insulin or combination of oral medications and insulin).

\*The weighted healthy lifestyle score was categorized as unfavorable, intermediate, and favorable lifestyle based on the distribution of the unweighted lifestyle score.
